# Supplementary material for: Estimate of global human papillomavirus vaccination coverage: analysis of country-level indicators
Source: HighWire-hosted journal article supplement (doi:10.1136/bmjopen-2021-052016), 2021-09-01
Supplement: bmjopen-2021-052016supp002_data_supplement.pdf [file bmjopen-2021-052016supp002_data_supplement.pdf]

## Source of underlying HPV vaccination coverage data

Data was extracted from the WHO/Unicef database “WHO estimates of Human papillomavirus immunization coverage 2010-2018, Version Date 12/07/2019” accessed and downloaded on 20 January 2020 from:

<https://data.unicef.org/resources/dataset/immunization/>.

This dataset may have been updated after this download date. For reference, a copy of the downloaded dataset is provided in the attached excel file. Attention is drawn to the “READ ME” tab which provides notes on methodology and data sources. All copyright and ownership rights of this excel file and the data it contains belong to WHO/Unicef. The authors of this study make no claims or representations regarding this file or the data contained therein.

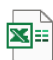

HPV\_estimates  
Unicef\_WHO 2019.xls
